# Supplementary material for: Mortality in Adult-Onset Autoimmune Diabetes Is Associated With Poor Glycemic Control
Source: Oxford University Press journal article supplement (doi:10.2337/dc13-0564), 2013-10-16
Supplement: dc130564supplementarydata.pdf [file dc130564supplementarydata.pdf]

SUPPLEMENTARY DATA

**Supplementary Figure 1.** Kaplan-Meier curves of all-cause mortality, 1995-2009.

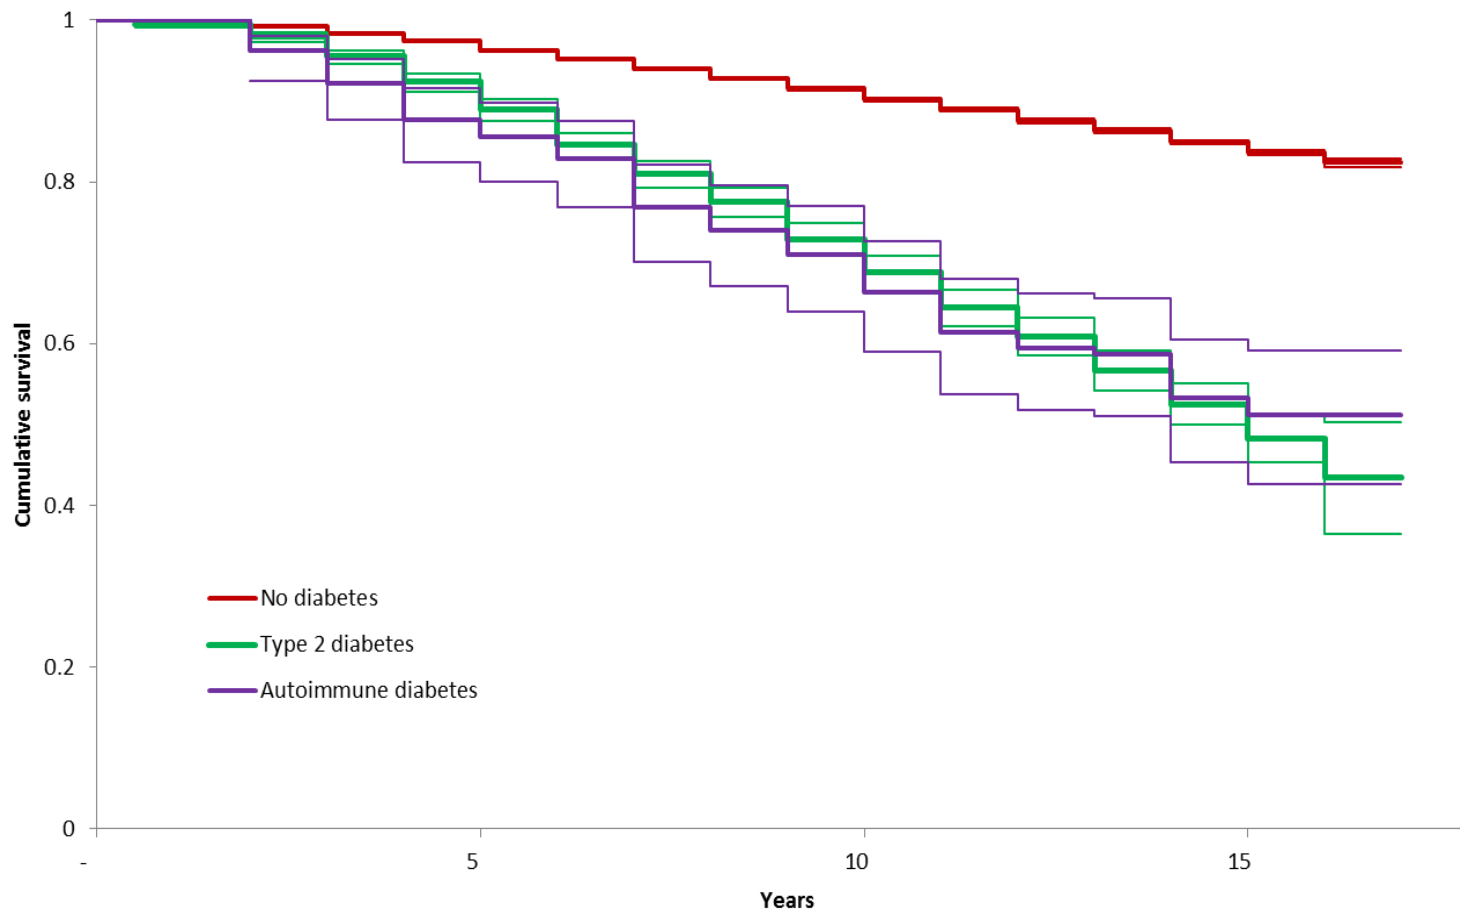

N observations in each stratum\*

|                     |       |       |       |       |
|---------------------|-------|-------|-------|-------|
| No diabetes         | 62682 | 60840 | 56684 | 18257 |
| Type 2 diabetes     | 2425  | 1942  | 1129  | 224   |
| Autoimmune diabetes | 208   | 168   | 119   | 26    |

\* Individuals without diabetes are censored if they develop diabetes and then moved to their diabetes group.
